# Supplementary material for: Improved indole syntheses from anilines and vicinal diols by cooperative catalysis of ruthenium complex and acid
Source: Royal Society of Chemistry journal article supplement (doi:10.1039/c3ra40458g), 2013-01-01

## Selected NMR spectra of obtained compounds

### $^1\text{H-NMR}$ of **3a**

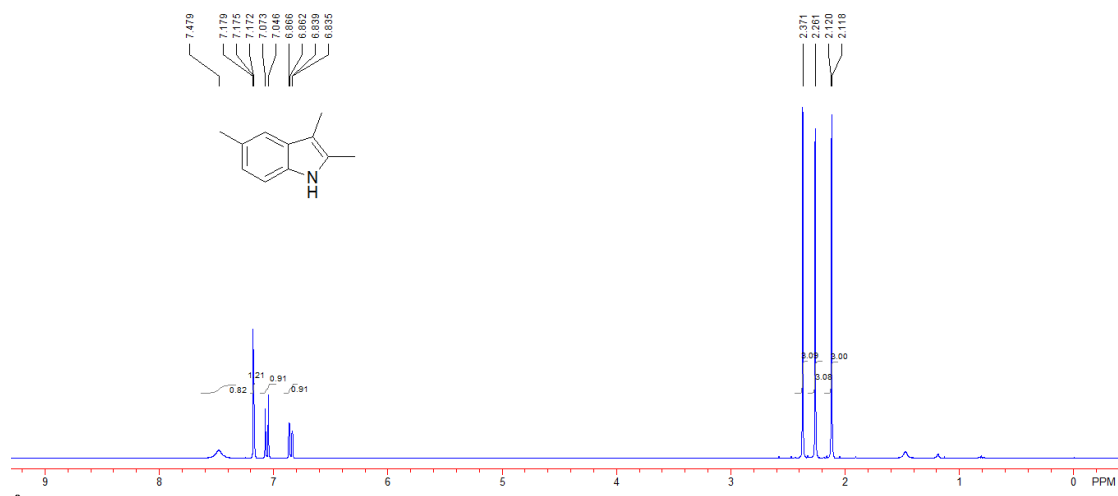

### $^{13}\text{C-NMR}$ of **3a**

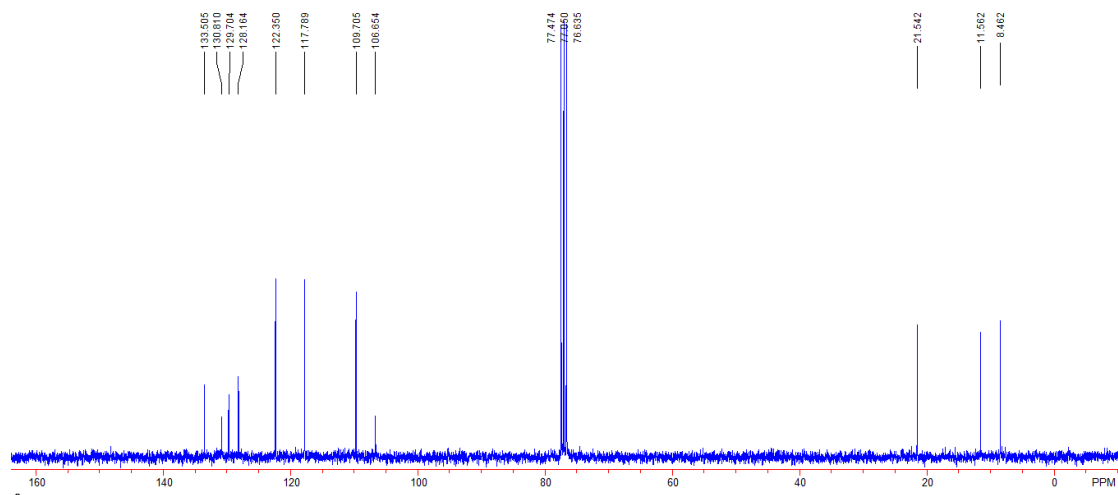

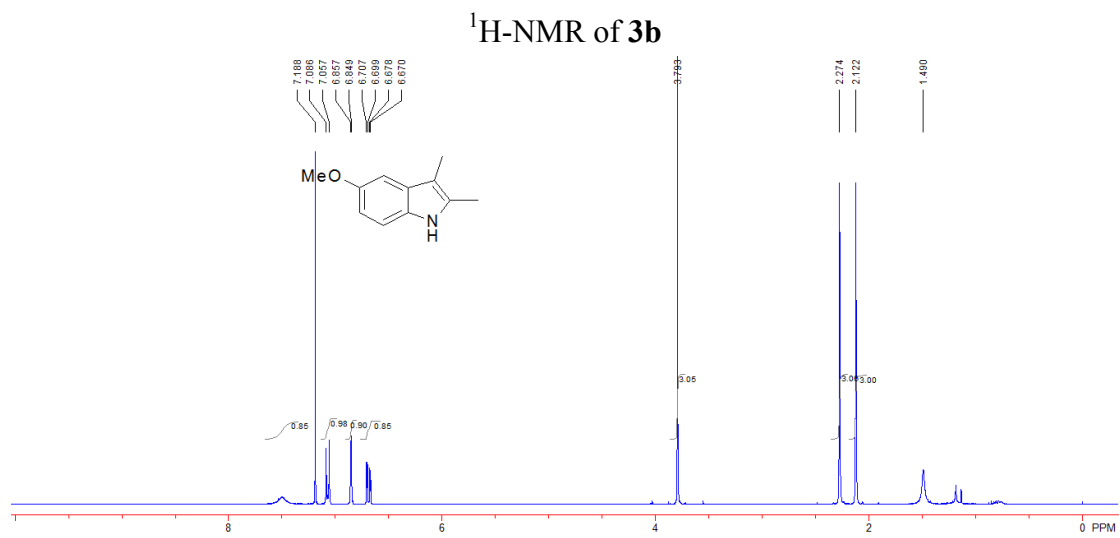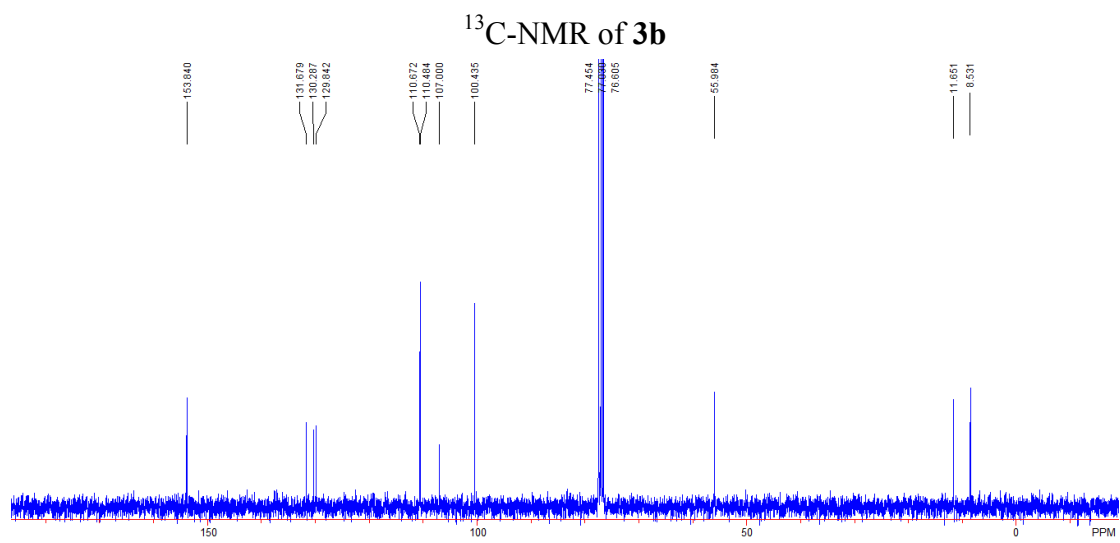

### <sup>1</sup>H-NMR of 3c

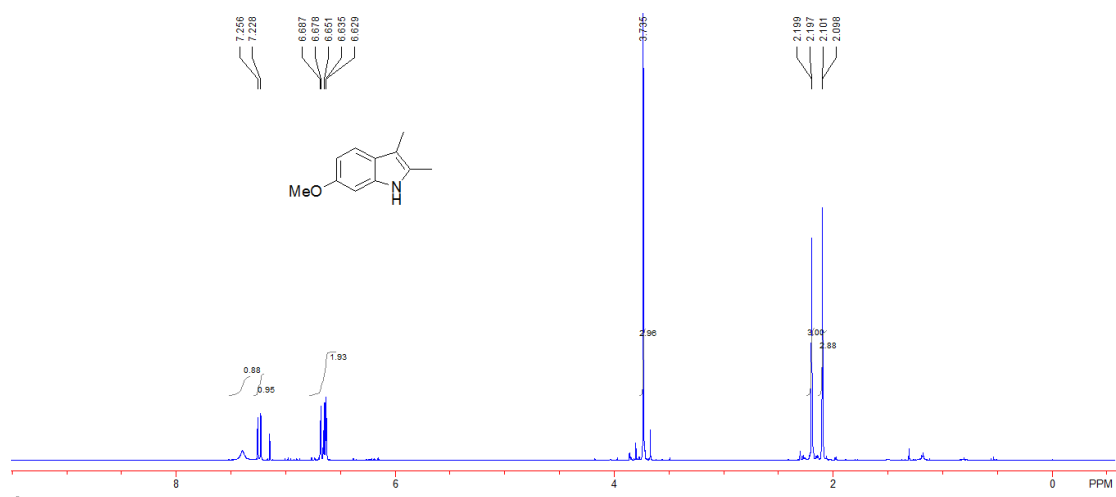

### <sup>13</sup>C-NMR of 3c

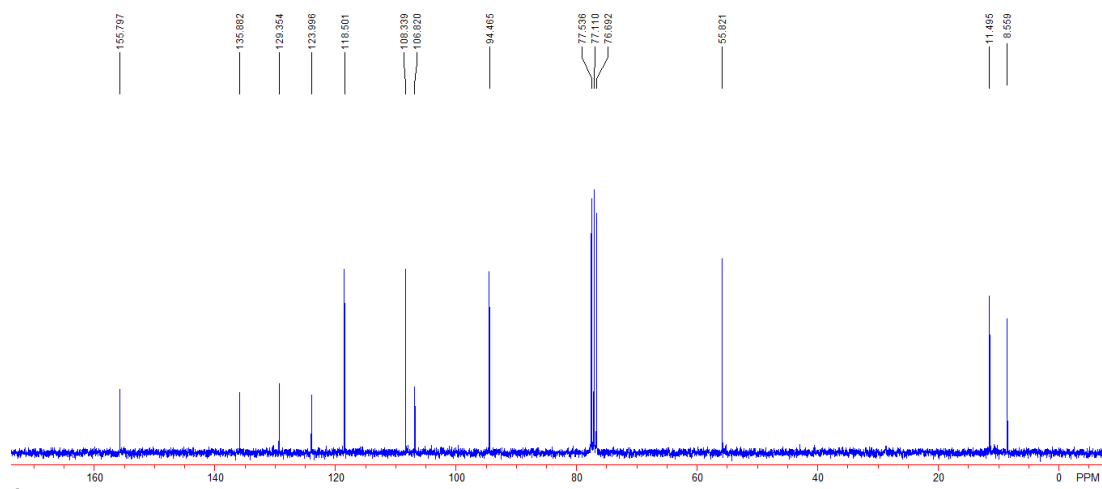

### <sup>1</sup>H-NMR of 3d

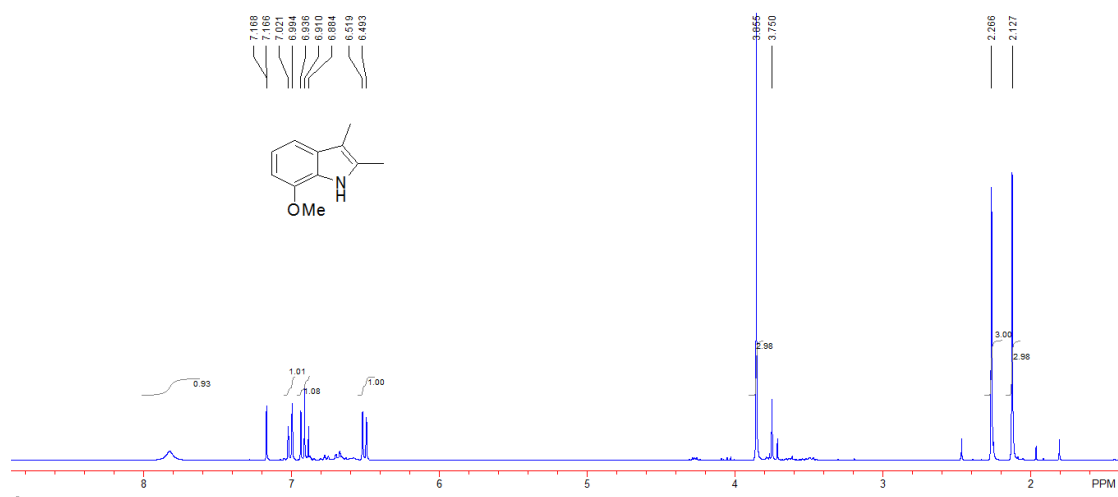

### <sup>13</sup>C-NMR of 3d

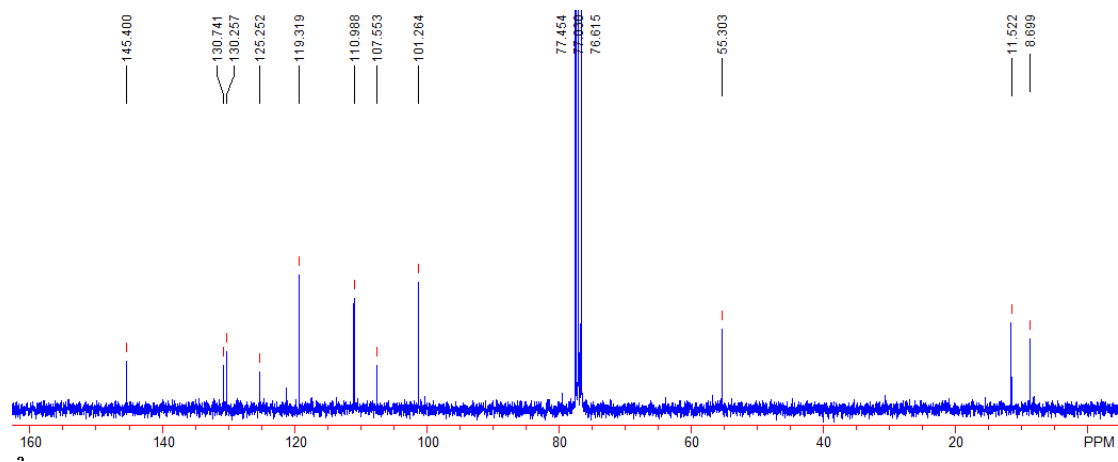

### $^1\text{H-NMR}$ of **3e**

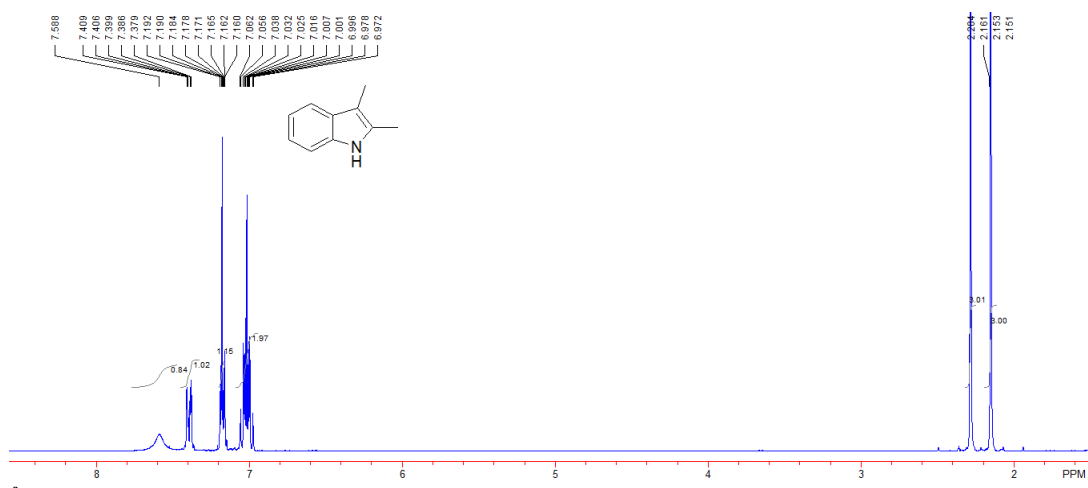

### $^{13}\text{C-NMR}$ of **3e**

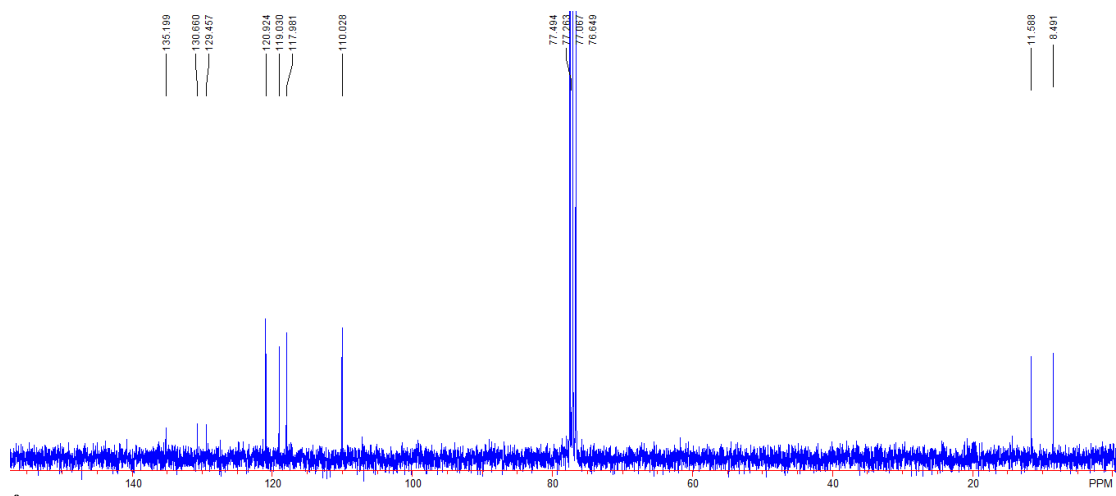

### <sup>1</sup>H-NMR of 3f

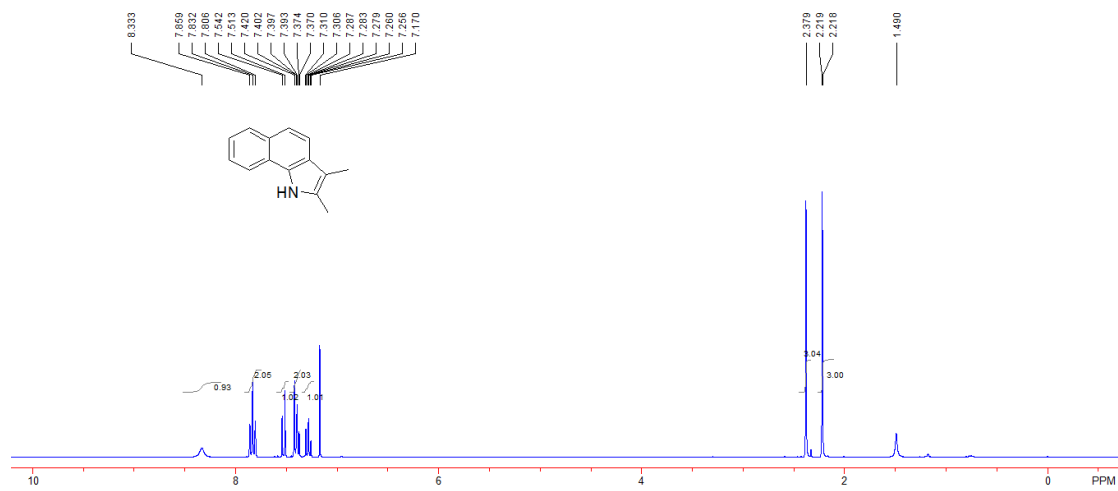

### <sup>13</sup>C-NMR of 3f

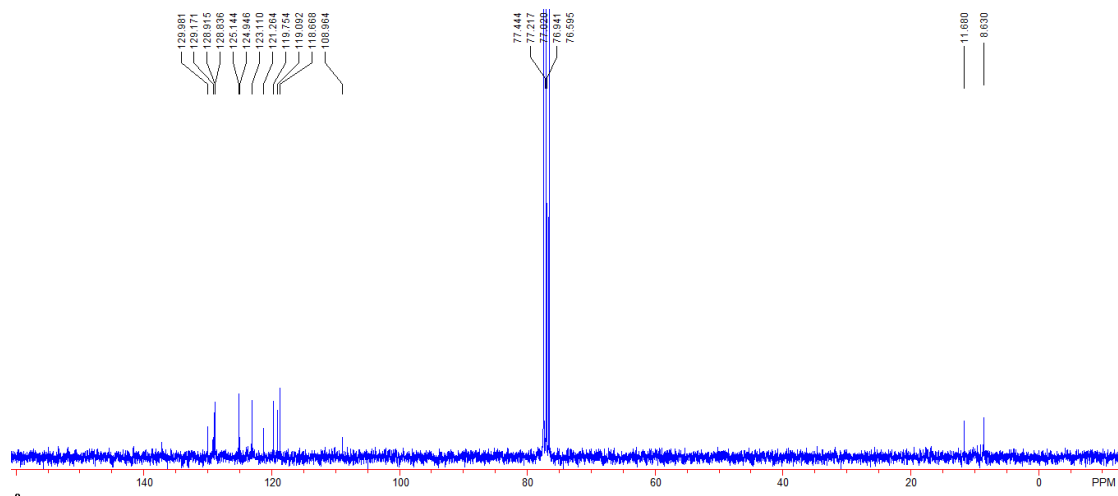

### <sup>1</sup>H-NMR of **3g**

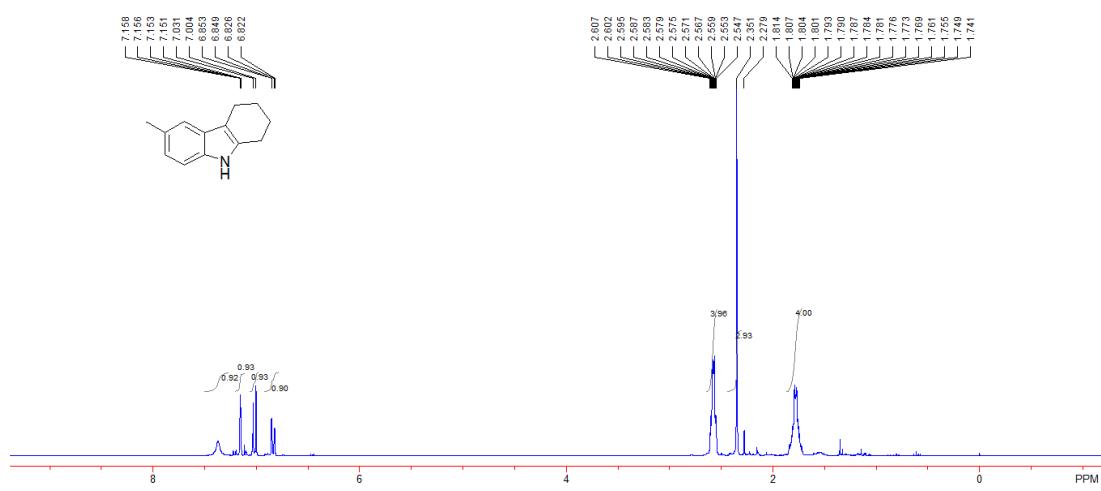

### <sup>13</sup>C-NMR of **3g**

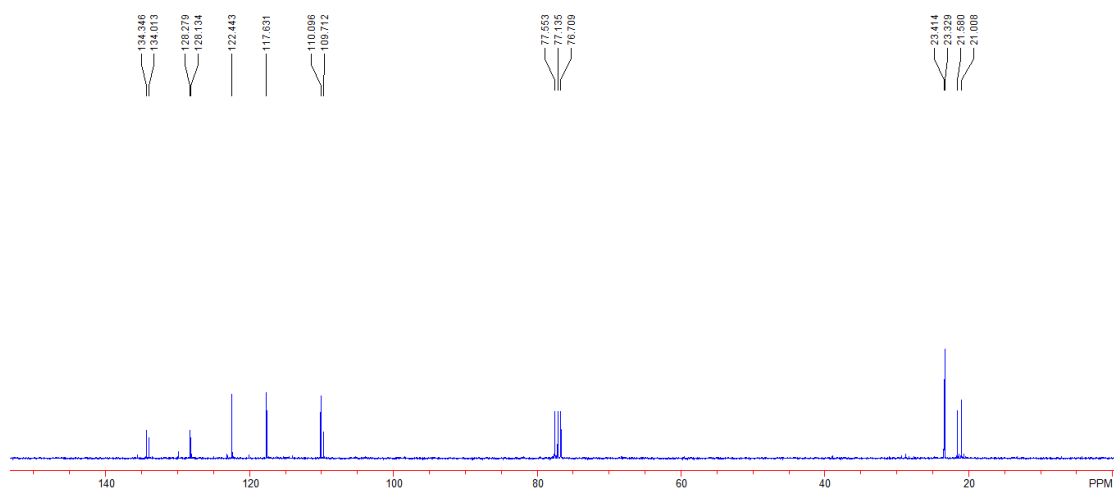

### <sup>1</sup>H-NMR of **3h**

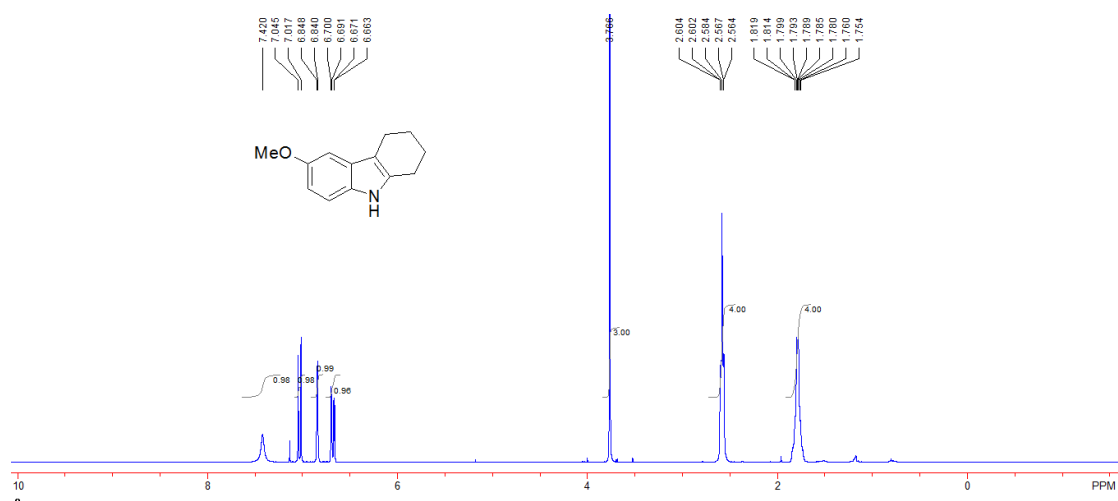

### <sup>13</sup>C-NMR of **3h**

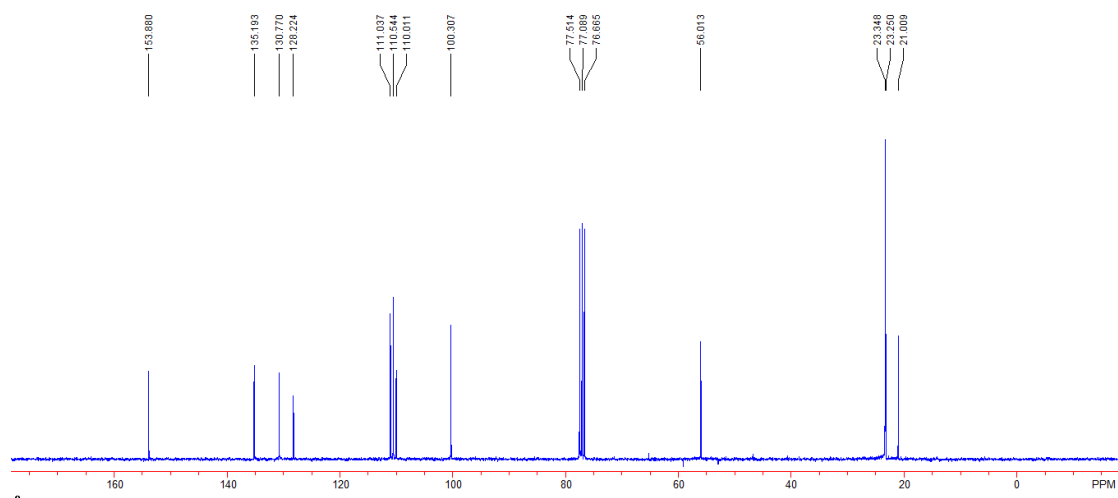



### $^1\text{H-NMR}$ of **3i**

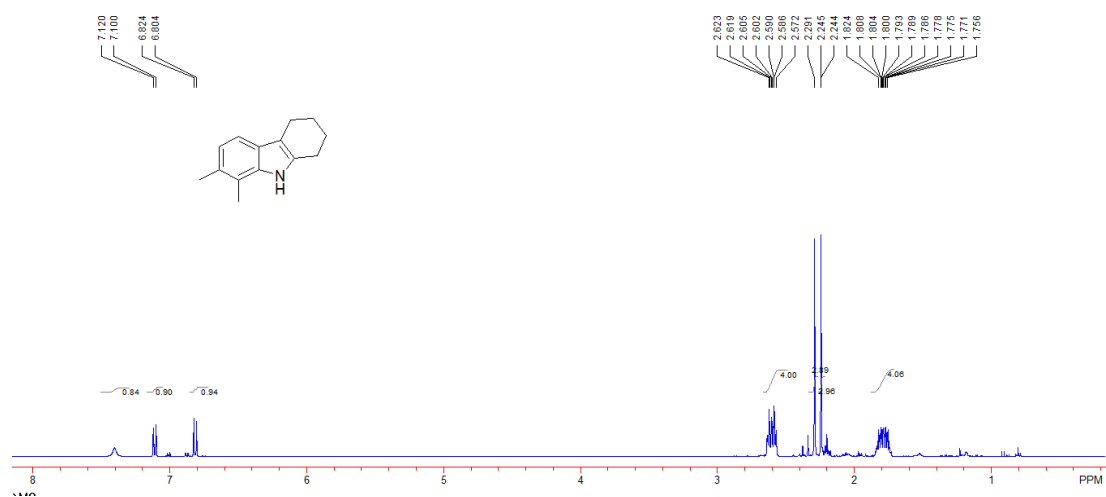

### $^{13}\text{C-NMR}$ of **3i**

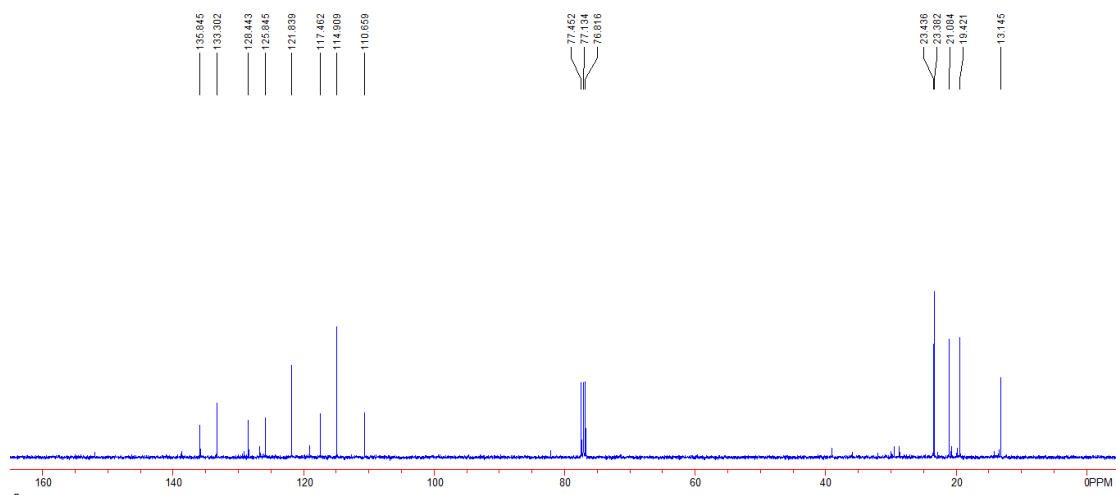

### <sup>1</sup>H-NMR of 3j

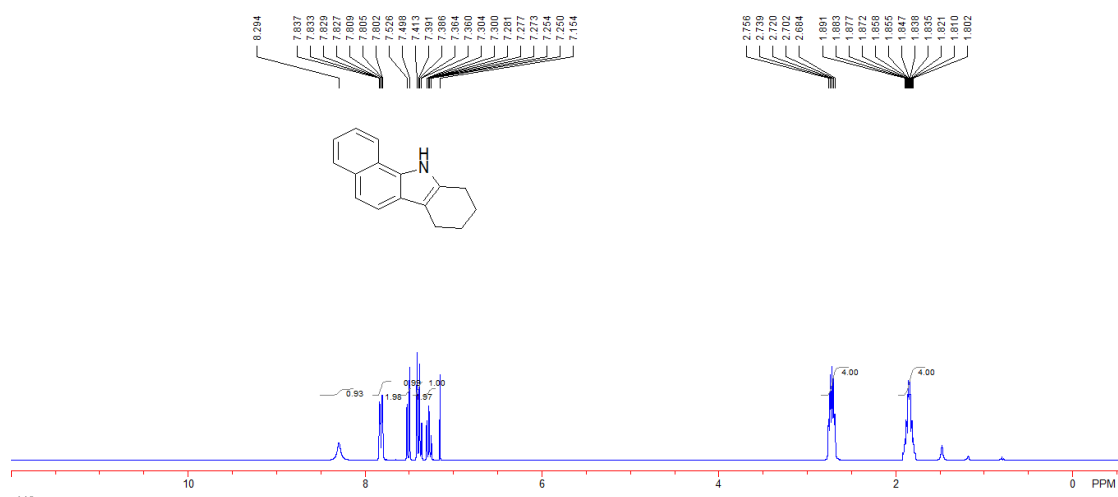

### <sup>13</sup>C-NMR of 3j

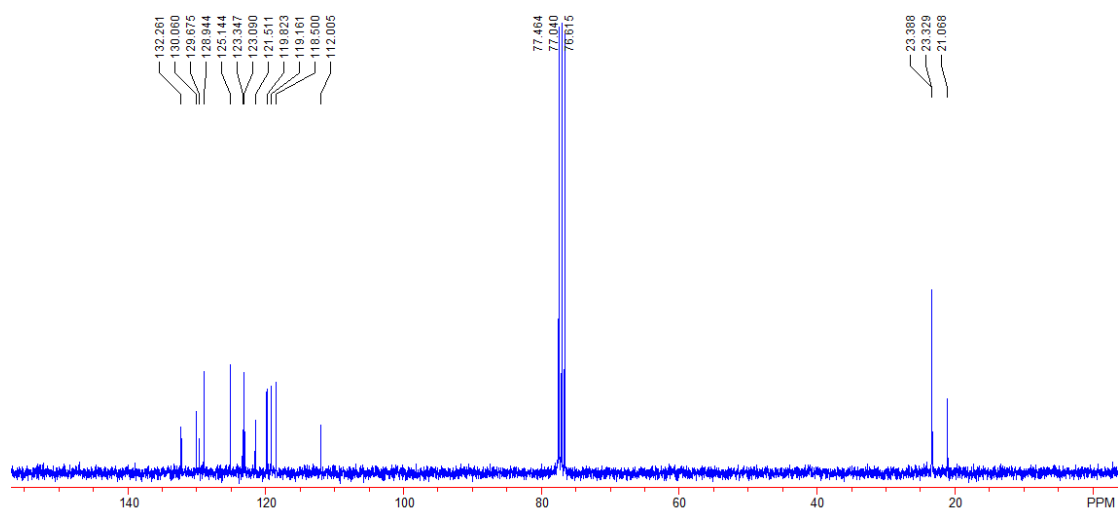

### <sup>1</sup>H-NMR of **3k**

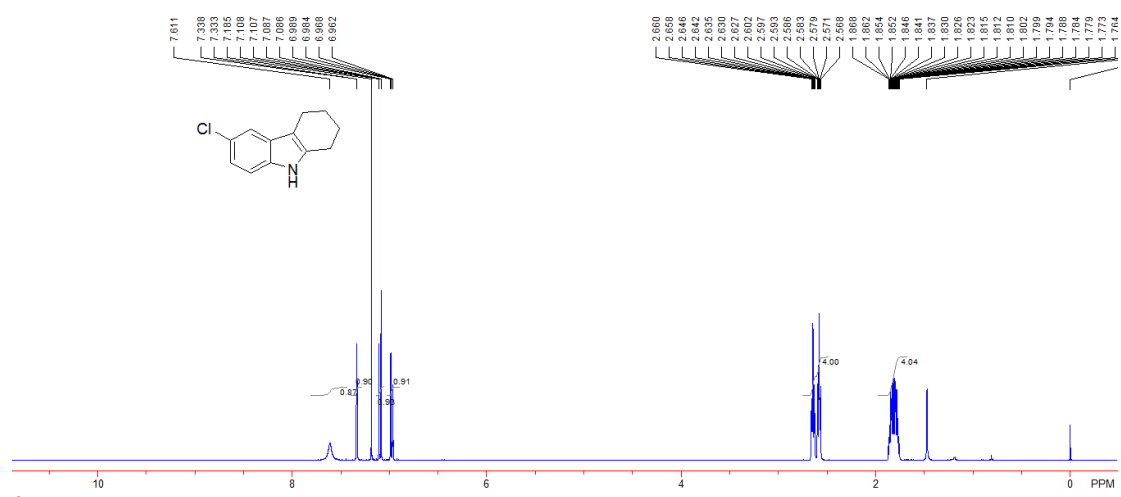

### <sup>13</sup>C-NMR of **3k**

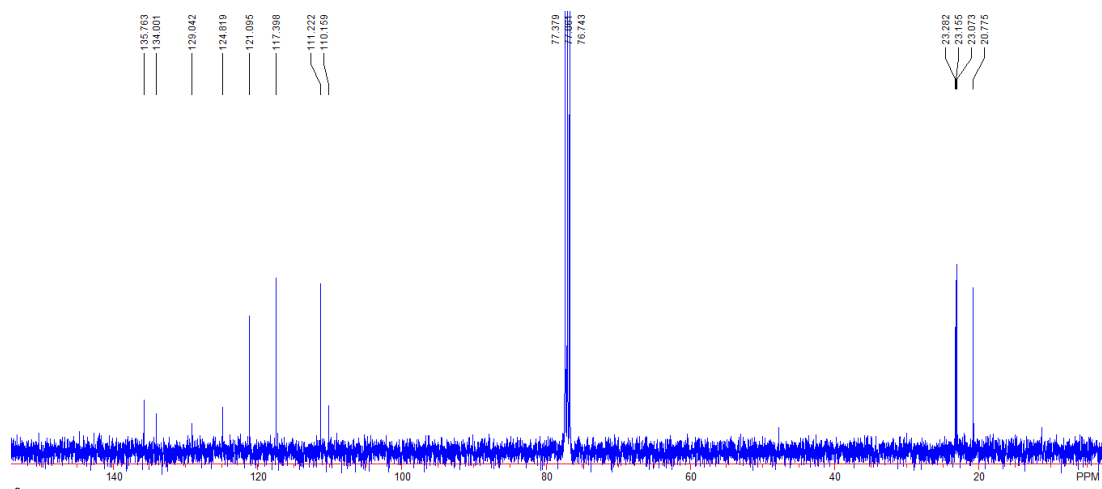

### $^1\text{H-NMR}$ of **31**

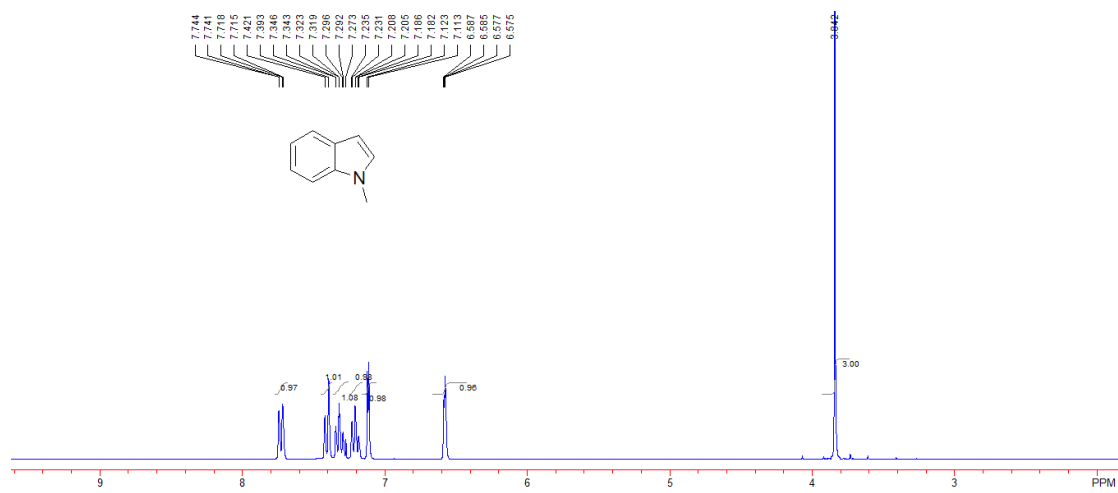

### $^{13}\text{C-NMR}$ of **31**

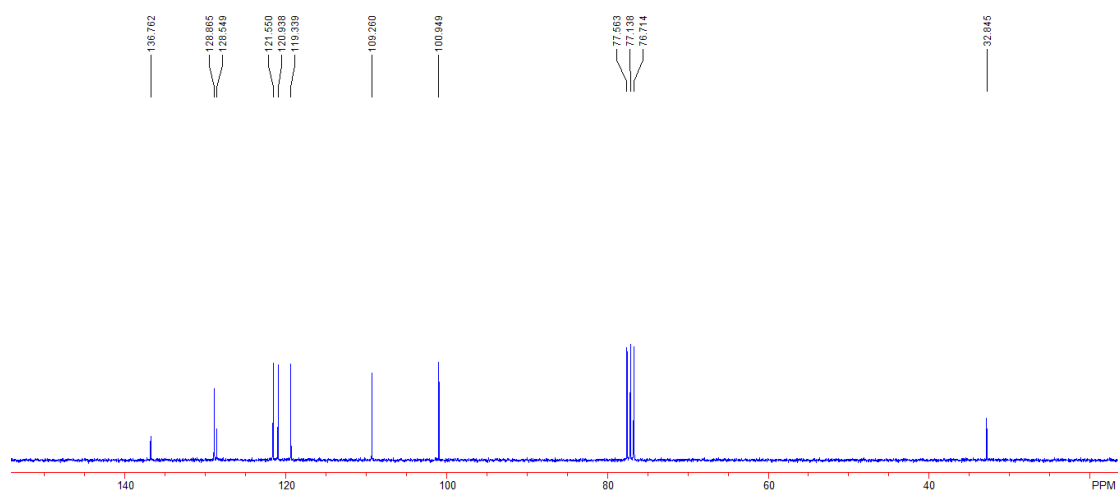

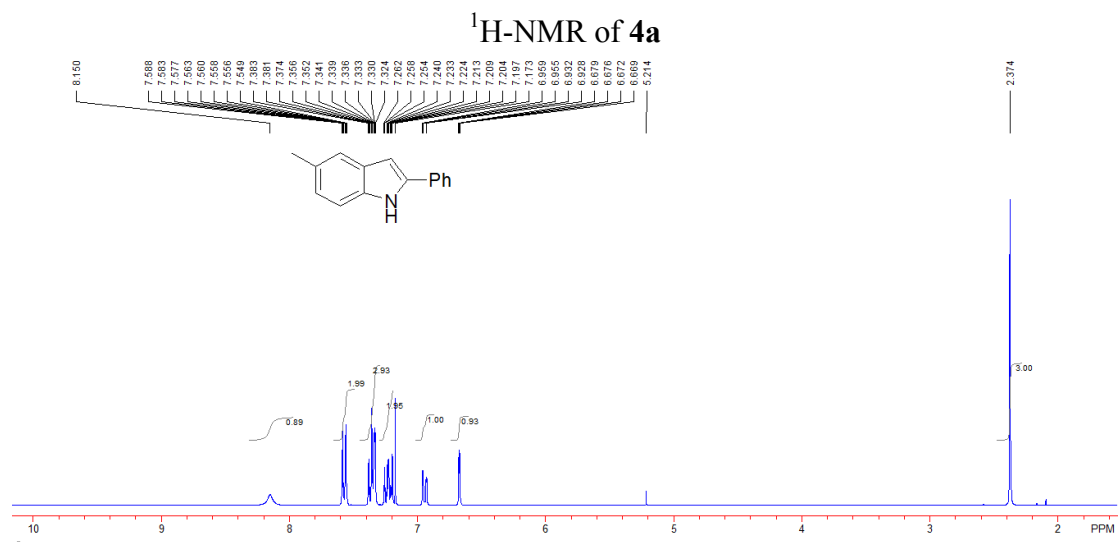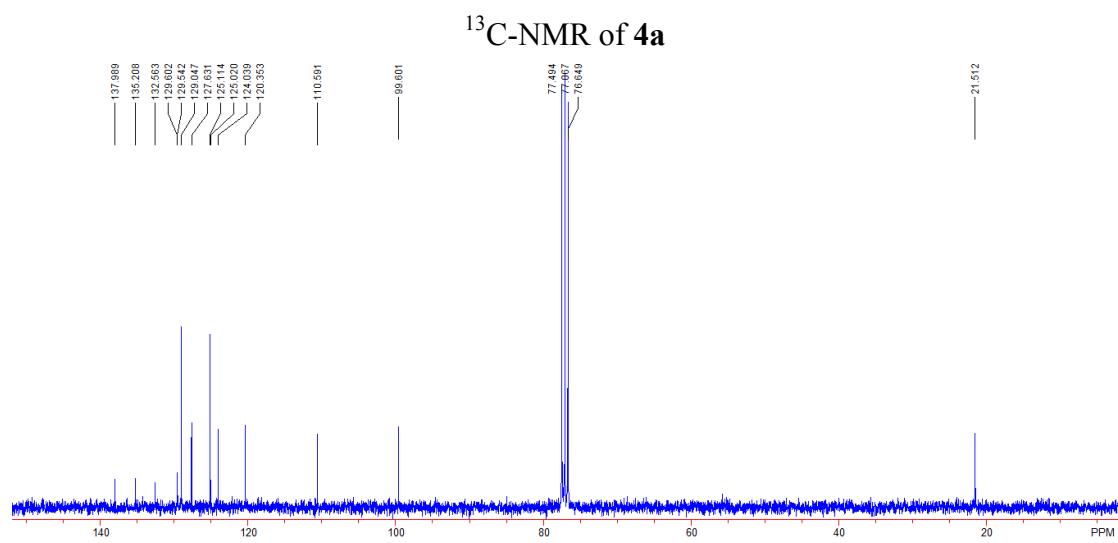

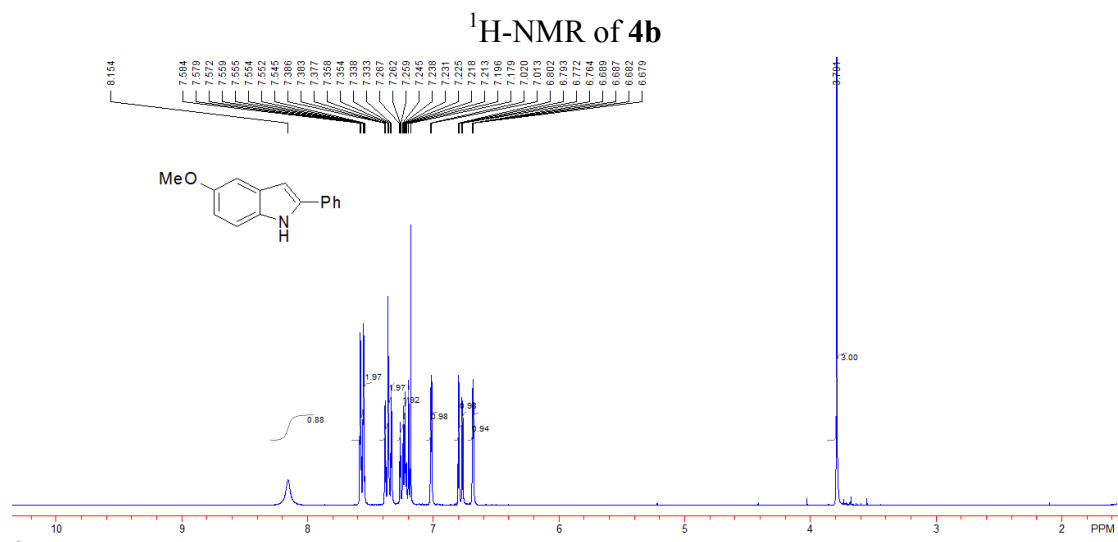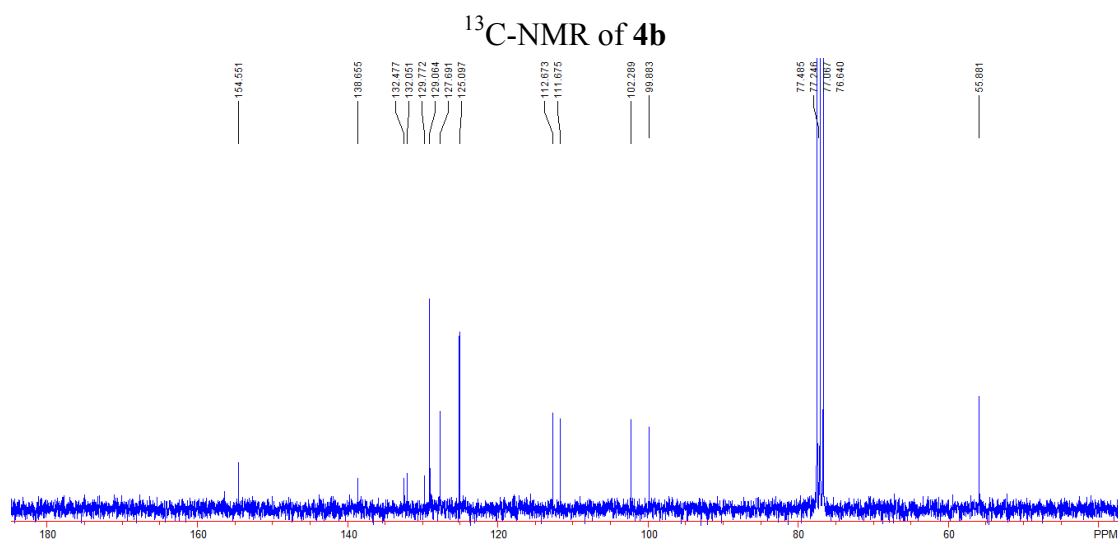

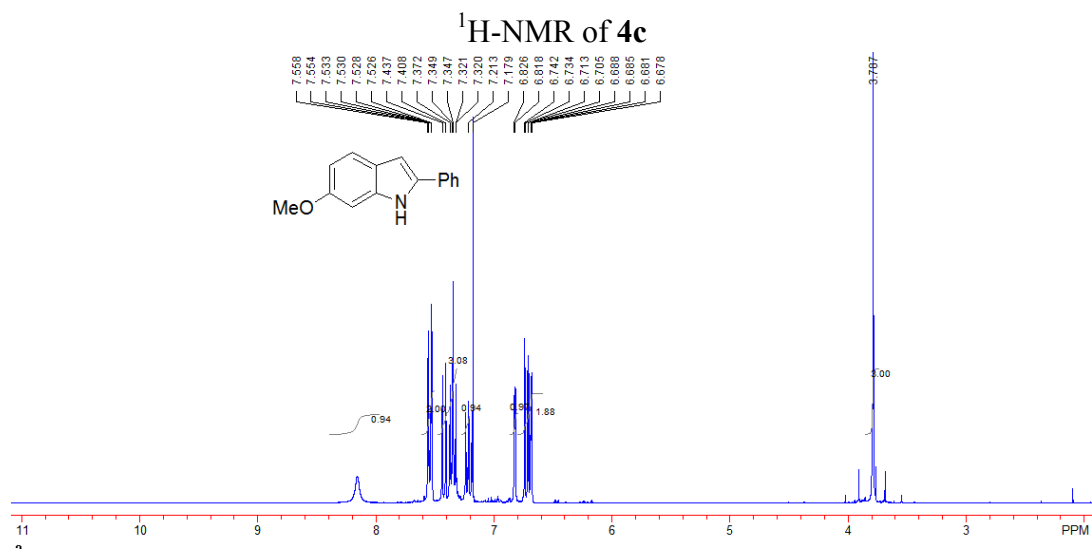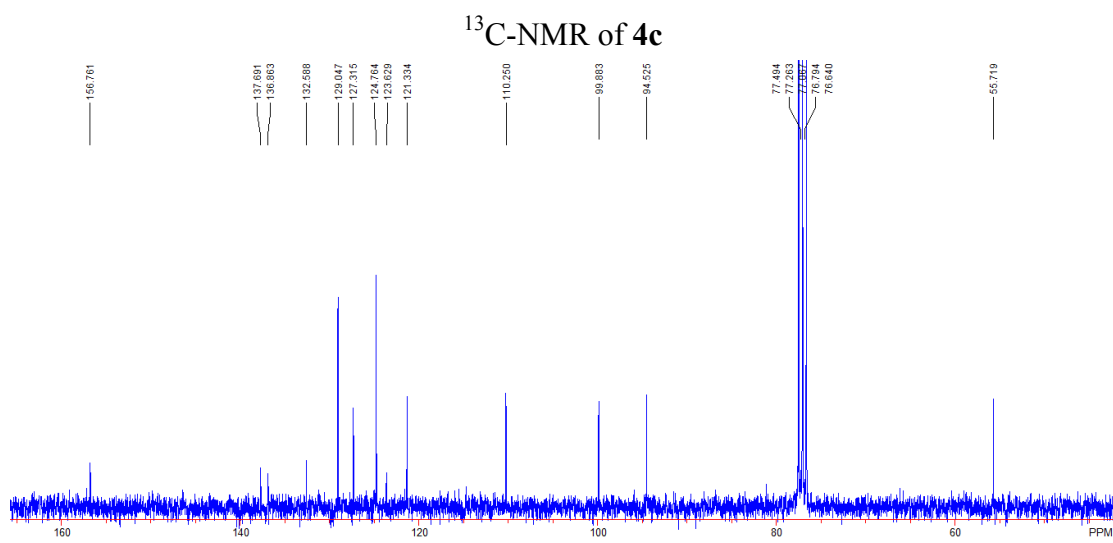

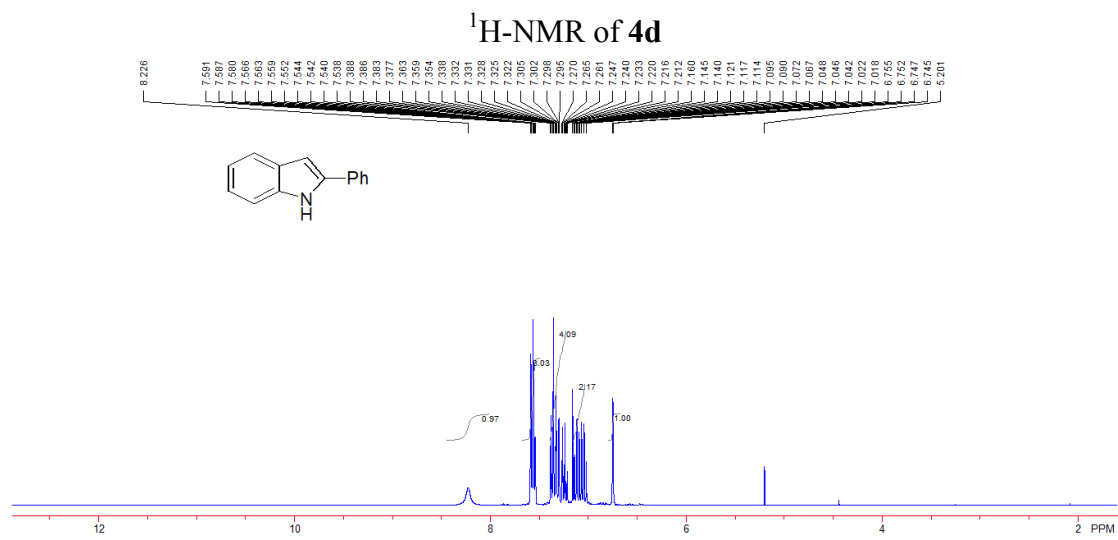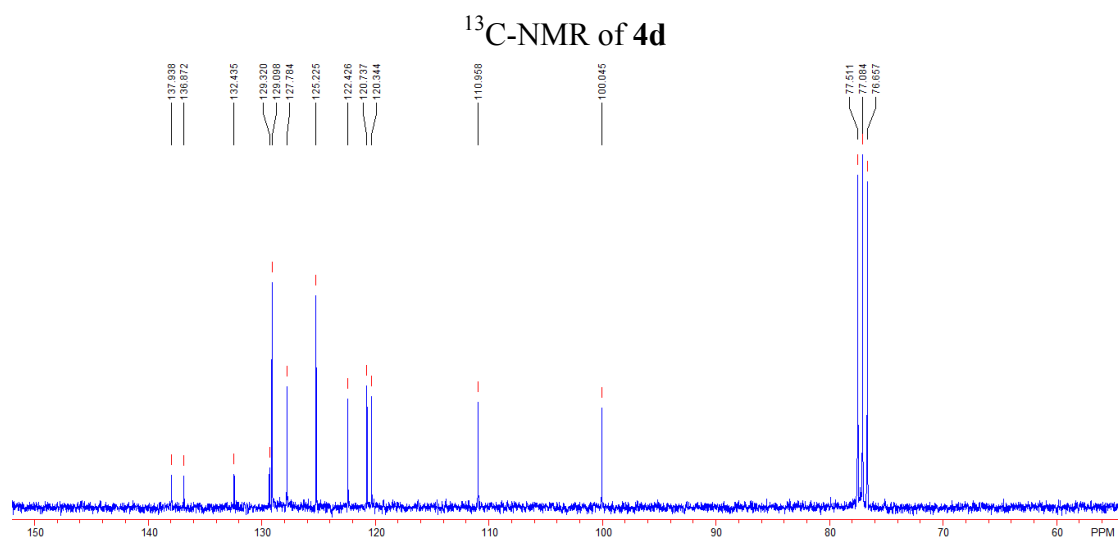



### $^1\text{H-NMR}$ of **4e**

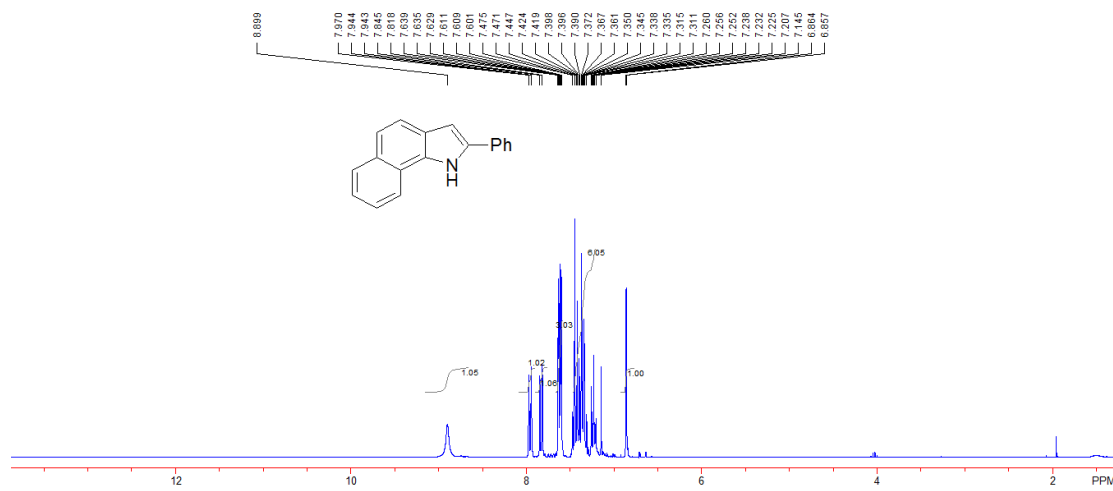

### $^{13}\text{C-NMR}$ of **4e**

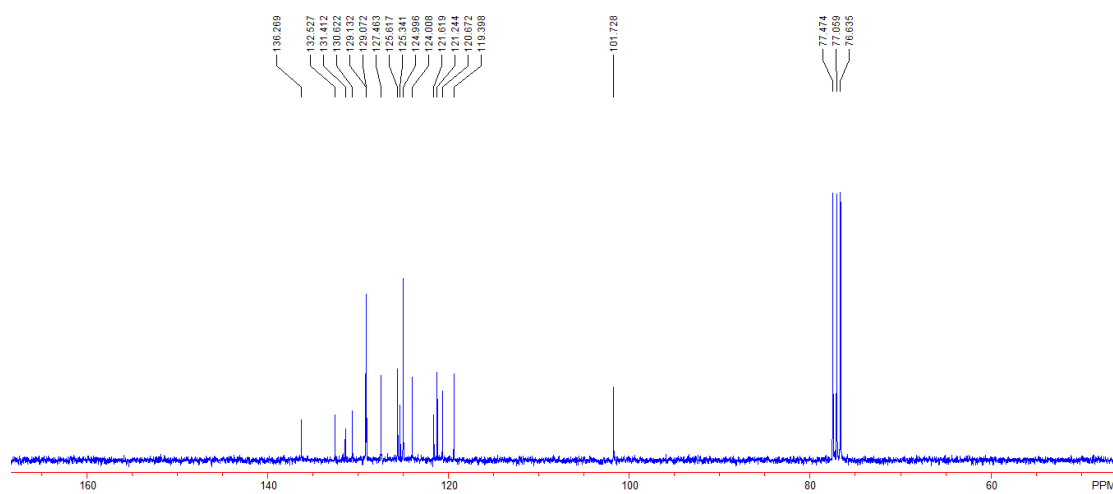

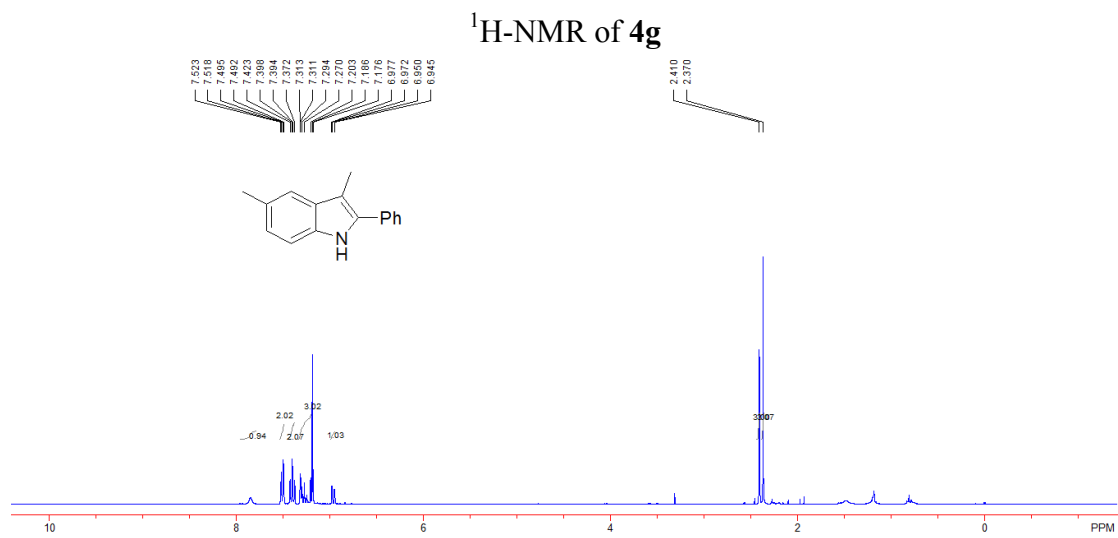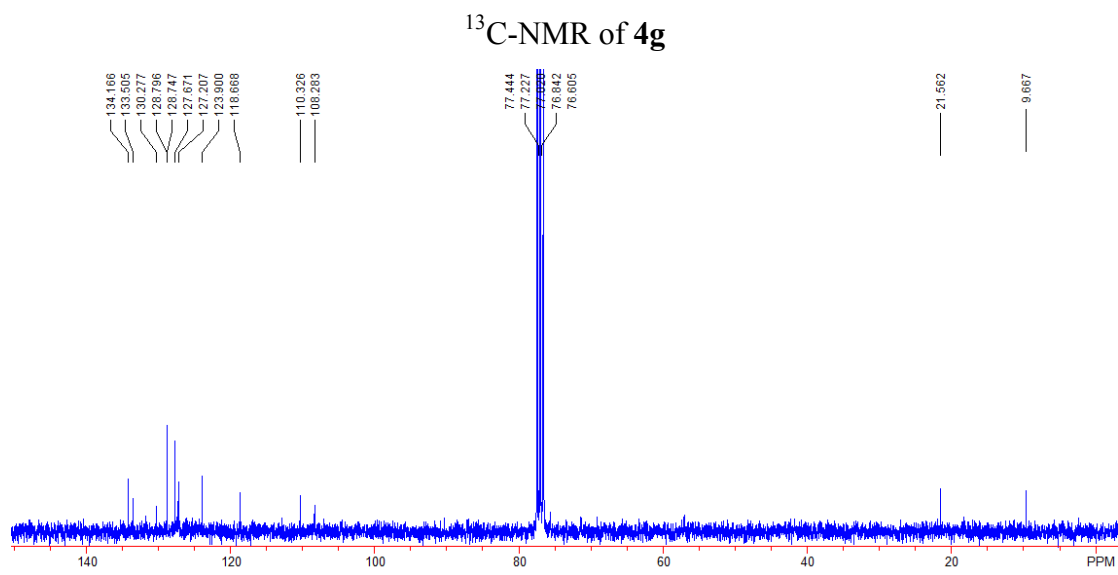

Supplement: c3ra40458g.pdf [file c3ra40458g.pdf]
